# Supplementary material
Source: PubMed Central journal article supplement (PMC8930626)
Supplement: NIHMS1778531-supplement-319491_Online.pdf [file NIHMS1778531-supplement-319491_Online.pdf]

## Supplemental Materials

Please see Major Resources Table in the Supplemental Materials.

### GSK-3 $\beta$ Knockout mice

At 10 weeks of age both male and female mice began tamoxifen chow diet (250 mg/kg Envigo TD.130855) for 5 consecutive days followed by two days of regular chow to maintain body weight, repeated for 3 weeks total. B and M-mode blinded echocardiography was performed (Vevo 2100, Fujifilm Visualsonics) prior to and following knockdown to detect any impact of the tamoxifen on global heart metrics such as ejection fraction and fractional shortening. All procedures were approved by IACUC.

### Tissue preparation and protein quantification

To prepare whole tissue lysates, left ventricular tissue (human and mouse) was homogenized in lysis buffer (in mM: 50 Tris pH 7.5, 150 NaCl, 1% Triton X-100) supplemented with protease and phosphatase inhibitor cocktails (Thermo Fisher Scientific). Samples were then sonicated and centrifuged at 15,000xg for 10 minutes.

To prepare myofilament enrichment, left ventricular tissue (human and mouse) was skinned by homogenization in standard relax buffer (SRB) (in mM: 75 KCL, 10 Imidazole, 2 MgCl<sub>2</sub>, 2 EDTA, 1 NaN<sub>3</sub>) with 0.3% Triton X-100 supplemented with protease and phosphatase inhibitor cocktails (Thermo Fisher). Samples were centrifuged at 15,000xg for 1 minute and the supernatant was discarded. The pellets were triturated in SRB with triton, centrifuged, and the supernatant discarded. The pellets were then washed twice by triturating with SRB without triton, centrifuged, and

27 the supernatant was discarded. The pellets were solubilized in 8M urea, sonicated, and  
28 centrifuged at 15,000xg for 10 minutes to clarify. Protein concentrations were quantified  
29 via bicinchoninic acid protein assay (BCA) (Pierce).

30

### 31 Immunoblotting

32 Equal amounts of sample were loaded onto 4-12% Bis-Tris gradient gels (Bolt)  
33 and transferred to nitrocellulose membrane. Membranes were incubated in blocking  
34 buffer (Licor) for one hour, and primary antibody overnight at 4°C. Primary antibodies  
35 used are as follows: GSK-3 $\beta$  (Cell Signaling Technology, 12456), GSK-3 $\beta$  pS9 (Cell  
36 Signaling Technology, D28E12), GSK-3 (Y279/Y216 (EMD Millipore, 05-413), Actin  
37 (Sigma-Aldrich, SAB5600071), GAPDH (Cell Signaling Technology, 2118), Tubulin (Cell  
38 Signaling Technology, 2144), TnI (ipoc, MA-1040), and TnI pS23/24 (Cell Signaling,  
39 4004S), Total cMyBP-C (Santa Cruz, sc-137180), abLIM-1 (Proteintech, 15129-1-AP).  
40 Blots were washed with TBS-T and incubated in infrared red dye conjugated secondary  
41 antibodies (Licor) at room temperature for one hour in the dark prior to being imaged on  
42 an Azure C600 infa-red imager at 700 and 800 nm. Signal intensity was quantified on  
43 Azure analysis software.

44

### 45 Skinned myocytes

46 Myocytes were prepared by homogenizing left ventricular tissue in isolation solution (in  
47 mM: 5.5Na<sub>2</sub>ATP, 7.11 MgCl<sub>2</sub>, 2 EGTA, 108.01 KCL, 891 KOH, 10 imidazole, 10 DTT)  
48 with 0.3% Triton and protease and phosphatase inhibitors (Thermo Fisher Scientific)  
49 and left on ice for twenty minutes. After “skinning”, the mixture was centrifuged at

50 120xg, and the pellet was re-suspended twice in isolation solution without triton to  
51 remove the detergent. A single myocyte was selected and attached to a force  
52 transducer and a length controller (Aurora Scientific) via pins with UV-curing glue. The  
53 sarcomere length was monitored using a video camera and calculated by the High-  
54 Speed Video Sarcomere Length software (Aurora Scientific) and was kept constant at  
55 the experimental SL (1.9, 2.1 or 2.3) throughout the experiment. The temperature was  
56 kept constant at 25°C. The myocyte was kept in relaxing solution (6.2 ATP, 6.5 MgCl<sub>2</sub>,  
57 10 EGTA, 100 BES, 10 phosphocreatine, 47.6 KProp) with phosphatase and protease  
58 inhibitors. The force was measured by moving the myocytes to different baths  
59 containing different calcium concentrations ranging from 0 to saturating conditions,  
60 created by mixing relaxing and activation solutions. The Activation solution contained (in  
61 mM): 5.95 Na<sub>2</sub>ATP, 6.2 MgCl<sub>2</sub>, 10 Ca<sup>2+</sup>-EGTA, 100 BES, 10 phosphocreatine, 29.98  
62 KProp, 10 DTT, phosphatase and protease inhibitors. Passive tension was measured in  
63 cells in relax solution. The sarcomere length was increased from 1.6 to 2.6 um, with  
64 force measurements being taken every 0.2 um. Each cell was then fit to an exponential  
65 curve.

66 Data from skinned myocytes were statistically analyzed on a per cell basis, not  
67 on a per animal basis. Approximately equal numbers of cells were analyzed from each  
68 animal, although this may introduce bias from non-independence.

69

### 70 Titin Gels

71 Titin sample and gel preparation methods were adapted from established protocols<sup>45</sup>.  
72 15-20 mg pieces were obtained from each heart under liquid nitrogen. Tissues were

73 pulverized using Kontes Dounce homogenizers (Kimble Chase, Rockwood, TN) while  
74 being maintained in liquid nitrogen. Tissues were solubilized at 60°C in the following  
75 buffer: 4M Urea, 1M Thiourea, 1.5% SDS, 25mM Tris-HCl, 37.5mM DTT, 25% Glycerol,  
76 + protease and phosphatase inhibitors (1:100) for 10 minutes. Solubilized tissue was  
77 then centrifuged at 14.8k rpm for 5 minutes and then aliquoted. Protein concentrations  
78 were determined using an RC/D assay (BioRad). Each sample was loaded in on a 1%  
79 agarose (SeaKem™ Gold, Lonza Group, Switzerland) gel: 50mM Tris Base, 384mM  
80 Glycine, 0.1% SDS, 30% Glycerol, using a large-format gel system (Hoeffer SE600X,  
81 Hoefer, Inc., Holliston, MA). Gels were run at 15mA/gel for 200 minutes at 4°C and then  
82 stained with Coomassie. Gels were scanned using an Azure C600 imager and  
83 quantified using Image J.

84

### 85 X-ray Diffraction

86 Papillary muscles were dissected from mice and skinned at 1% Triton X in  
87 relaxing solution (containing in mM: 6.3 Na<sub>2</sub>ATP, 6.48 MgCl<sub>2</sub>, 10 EGTA, 100 BES, 10  
88 phosphocreatine, 49.76 KPropionate, 10 DTT, and creatine kinase 10 U/ml) overnight.  
89 Next day, the muscles were washed with fresh cold relaxing solution and muscles were  
90 further dissected in fiber strips, clipped on aluminum T-clips and stored in cold relaxing  
91 solution for the day.

92 X-ray diffraction patterns were collected from freshly skinned muscle strips using  
93 the small-angle instrument at BioCAT beamline 18ID at the Advanced Photon Source,  
94 Argonne National Laboratory<sup>32</sup>. The X-ray beam was focused to ~0.04 × 0.10 mm at the  
95 detector plane. The sample-to-detector distance was ~3.5 m, and the X-ray wavelength

96 was 0.103 nm. Isolated fiber bundles (~200  $\mu\text{m}$  diameter, 2-3 mm long) were mounted  
97 between a force transducer (Model 402A, Aurora Scientific) and a static hook. Force  
98 was monitored using the Muscle Dynamic Control system (Model 610A, Aurora  
99 Scientific). Sarcomere length was adjusted by laser diffraction using a 4-mW HeNe  
100 laser. Diffraction patterns were collected at sarcomere lengths of 2.1  $\mu\text{m}$  and 2.4  $\mu\text{m}$ . X-  
101 ray exposures were 1 s at an incident flux of  $\sim 3 \times 10^{12}$  photons per second, and the  
102 patterns were collected on a CCD-based X-ray detector (Mar 165; Rayonix Inc.  
103 Evanston, IL). The data were analyzed using data reduction programs belonging to the  
104 MuscleX software package developed at BioCAT<sup>33</sup>. The spacings of the 1,0 equatorial  
105 X-ray reflections were measured using the “Equator” routine in the MuscleX software  
106 package as described previously<sup>34</sup>.

107

### 108 Immunofluorescence

109 Human or mouse LV was homogenized in isolation solution (see above) with  
110 0.3% triton, with protease and phosphatase inhibitors (1:100). Cells were plated onto  
111 chamber slides coated with Poly\_L\_lysine solution (Millipore Sigma, P4707) and  
112 allowed to adhere for 20 minutes. Cells were fixed with ice cold methanol for 1 minute,  
113 and then 4% paraformaldehyde (PFA) for 3 minutes. To skin, cells were washed twice  
114 with PBS with 0.5% Triton for 20 minutes each, followed two washes in PBS with 0.1%  
115 Triton for 15 minutes. The samples were then incubated in antigen-retrieval solution (0.1  
116 M Glycine, pH 7.4) for 30 minutes. After washing three times with PBS, the slides were  
117 incubated for 30 minutes at room temperature in blocking solution (1% BSA in PBS)  
118 diluted 1:1 with PBS. Primary antibody was diluted in blocking solution at the following

119 dilutions: GSK-3 $\beta$  (Cell Signaling Technology, 12456, 1:150), GSK-3 $\beta$  pS9 (Cell  
120 Signaling Technology, D28E12, 1:150), GSK-3 $\beta$  pY216 (Abcam, ab75745, 1:200), N-  
121 cadherin (1:200) abLIM-1 (Proteintech, 15129-1-AP, 1:200), Alpha-Actinin (Sigma-  
122 Aldrich, A7732, 1:500). Slides were incubated with primary antibody overnight at 4°C.  
123 The following day, slides were washed three times with PBS, and incubated with  
124 secondary antibody, Alexa Fluor 488 and 568, (Thermo Fisher Scientific) diluted in  
125 blocking solution at room temperature for one hour. Slides were then washed with PBS  
126 and mounted with hard-set Vectashield with DAPI (Vectashield) and stored in the dark  
127 prior and post imaging. Slides were imaged on a Zeiss LSM 880 with a 40X oil  
128 objective. To test for non-specific binding, both human and mouse myocytes were  
129 incubated with (1) both rabbit and mouse IgG at a concentration which matched those  
130 of primary antibodies used (followed by incubation with incubation with Alexa Fluor 488  
131 and 568 secondary antibodies or (2) Alexa Fluor 488 and 568 secondary antibodies in  
132 the absence of primary antibodies. This imaging was performed in parallel with imaging  
133 of GSK-3 $\beta$  and actinin specific primary antibodies and imaging conditions (laser power  
134 and gain) were kept constant across imaging of control slides.

135

### 136 Recombinant Z1Z2 and abLIM-1 co-immunoprecipitation

137 50  $\mu$ l of Dynabeads Protein G (Thermo Fisher Scientific) were incubated with  
138 either 10  $\mu$ l GST antibody (Cell Signaling) or mouse IgG diluted into 200  $\mu$ l of PBS-T for  
139 10 minutes at room temperature. Antibody conjugated beads were cross-linked with 20  
140 mM dimethyl pimelimidate dihydrochloride in 100 mM sodium borate (pH 9).  
141 Crosslinking was inactivated by washing twice with antibody blocking buffer (200 mM

142 ethanolamine pH 8). Crosslinked beads were then blocked at 4 degrees for two hours.  
143 Beads were then washed three times with IAP Buffer (50 mM MOPS (pH 7.2), 10 mM  
144 sodium phosphate, 50 mM NaCl). The beads were then incubated with recombinant  
145 Z1Z2 and abLIM-1 diluted in PBS-T for 15 minutes at room temperature. Treatment  
146 groups were as follows: IgG= 0.24 µg of Z1Z2 (a kind gift from Siegfried Labeit) and 0.5  
147 µg of GST-tagged abLIM-1 (Novus Biologicals, H00003983-P01), BL= 0.24 µg of Z1Z2  
148 and 0.5 µg of GST-tagged abLIM-1, GSK = 0.24 µg of Z1Z2 and 0.5 µg of GST-tagged  
149 abLIM-1 that had been pre-treated with 0.5 µg of recombinant GSK-3β for 10 minutes).  
150 The beads were then gently washed 6 times with PBS-T. After the final wash, the beads  
151 were eluted in 0.15% Formic acid. Samples were treated with 5 mM DTT, followed by  
152 10 mM Iodoacetamide, and then digested with 0.02 ug of trypsin overnight. Samples  
153 were run through C18 spin columns (Thermo Fisher) and then dried in a speed vacuum.  
154 Samples were then reconstituted in HPLC water with 0.15% formic acid and run on an  
155 Ultimate 3000 nHPLC coupled to an Orbitrap XL Mass Spectrometer (Thermo Scientific)  
156 using a 250mm EASY-Spray LC column. Data were analyzed on PEAKs software, and  
157 spectra were searched against a custom Z1Z2 and abLIM-1 database.

158

### 159 GSK-3β co-immunoprecipitation (IP)

160 Myofilament enriched samples from human non-failing LV (n=5) were used for  
161 these experiments. To bind the antibody to the beads, 10µg of antibody: (GSK-3β (Cell  
162 Signaling Technology, 12456), GSK-3β pS9 (Cell Signaling Technology, D28E12),  
163 GSK-3 (Y279/Y216 (EMD Millipore, 05-413) diluted in PBS-T were combined with 50 µl  
164 of Dynabeads Protein G (Thermo Fisher Scientific) and incubated with rotation, at room

165 temperature, for 10 minutes. The beads were then separated from supernatant with a  
166 magnetic stand, and the supernatant was discarded. Beads were gently washed in  
167 PBS-T. To allow binding of protein to the antibody-conjugated beads, 400 µg of protein  
168 was added to the beads and incubated with rotation for 10 minutes at room  
169 temperature. The supernatant was kept to run as the flow-through fraction. The beads  
170 were then gently washed 6 times with PBS-T. After the final wash, the beads were  
171 suspended in loading buffer and boiled, and the eluted supernatant was loaded on a 4-  
172 12% Bis-Tris gel (Bolt) with the corresponding flow-through fractions. The gels were  
173 then fixed and silver-stained (BioRad). The reaction was stopped with 5% acetic acid  
174 when the background became saturated.

175

#### 176 Adenovirus and pcDNA

177 WT mouse GSK-3β (NM\_019827) was purchased from Origene (Cat: MR206669) and  
178 216 F and E oligonucleotides were purchased from IDT. Y216F and Y216E were  
179 subcloned into the WT GSK-3β plasmid using standard methods. The WT GSK-3β  
180 contained a c-terminal Flag tag, and the two mutants contained by c-terminal Flag and  
181 Myc tags. Adenoviruses were generated using the Agilent Adeasy XL system (cat #  
182 240009) following manufacturer protocols. Viruses were CsCl purified prior to dialysis and  
183 use.

184

#### 185 NRVM Isolation

186 Neonatal rat ventricular cardiomyocytes (NRVMs) were isolated from 1-day old  
187 rat pups. Hearts were digested with trypsin and collagenase, using the Worthington



188 Neonatal Cardiomyocyte Isolation System (Worthington). Cells were plated and allowed  
189 to incubate at 37°C for 24 hours prior to continuing experiments.

190

#### 191 NRVM Viral overexpression

192 RNVMS were infected with either wild type GSK-3 $\beta$ , GSK-3 $\beta$  Y216F, GSK-3 $\beta$   
193 Y216E, or an empty control vector. Samples incubated for 24 hours before harvest. A  
194 portion of the cell lysate was used for immunoblotting (as described above) to verify and  
195 quantify the overexpression. The primary antibodies were as follows: GSK-3 $\beta$  (Cell  
196 Signaling Technology, 12456), GSK-3 $\beta$  pS9 (Cell Signaling Technology, D28E12),  
197 GSK-3 (Y279/Y216 (EMD Millipore, 05-413)) and tag antibodies: Myc tag (Cell Signaling  
198 Technology, 2278) and Flag tag: (Cell Signaling Technology, 8146).

199 Prior to performing co-immunoprecipitation experiments, cell lysis was skinned in  
200 0.3% triton for 15 minutes. The samples were centrifuged and washed twice with PBS,  
201 and then solubilized in 8M urea. The samples were then sonicated and centrifuged. Co-  
202 immunoprecipitation was performed as described above, with the myc-tag antibody  
203 used to pull down proteins, as this tag was found on all three virus constructs. A subset  
204 of the cell lysis was incubated with beads that lacked antibody, to control for non-  
205 specific binding. The eluted samples and flow-throughs were run on a 4-12% Bis-Tris  
206 gel and silver-stained.

207

#### 208 RNA extraction and cDNA synthesis

209 RNA was extracted from LV from GSK-3 $\beta$  CON and KO mice using an RNeasy  
210 Fibrous Tissue Kit (Qiagen), following the manufacturer protocol. 5 ug RNA was

211 synthesized to cDNA using SuperScript IV Reverse Transcriptase (Thermofisher)  
212 following the manufacturers protocol.

213

#### 214 Real-time PCR

215 SYBR Green PCR Master Mix (Applied Biosystems), 2 ul of cDNA, and 0.25 uM  
216 of primers were used for each real-time qPCR reaction. Data was analyzed using the  $\Delta$   
217  $\Delta\Delta$ CT method in which ABLIM-1 RNA expression was compared to that of beta actin.

218 ABLIM-1 primer Sequence:

219 F: CAC ATC AGG CTA TGA GGA CAA G

220 R: CGA TCC CGG ACA TCT TGA TAA C

221

222 Beta Actin Primer Sequence:

223 F: GAG GTA TCC TGA CCC TGA AGT A

224 R: CAC ACG CAG CTC ATT GTA GA

225

#### 226 siRNA

227 abLIM-1 siRNA (Sigma-Aldrich, SASI,Rn02\_00205714) or scrambled control  
228 RNA (Sigma Aldrich) was transfected into iPSC cells with Lipofectamine RNAiMAX  
229 Reagent (Thermofisher) following manufacturer's instructions. Briefly, Lipofectamine  
230 was diluted into Opti-MEM, and then combined with diluted siRNA (10 uM). After a 10-  
231 minute incubation at room temperature, the siRNA-lipid complex was added to the cells.  
232 After two hours, the media was replaced with standard maintenance media. Cells were  
233 harvested or used for experiments after 72 hours.

234

#### 235 Engineered Heart Tissues (EHTs)

236 To prepare decellularized porcine scaffolds, fresh pig hearts (Latella Farm, West Haven,  
237 CT) were preserved in ice-cold DPBS with 5% pen-strep. Left ventricular free wall  
238 portion of the hearts was trimmed and frozen on dry ice before cryostat sectioning  
239 (Leica CM3050 S) into 150- $\mu$ m slices. 2.5 mm  $\times$  6 mm scaffolds were laser-cut from the  
240 slices, affixed to laser-cut PTFE holders, lysed (10mM Tris and 0.1% 0.5M EDTA in DI  
241 water), decellularized (0.5% wt/vol sodium dodecyl sulfate in DPBS), and incubated  
242 overnight before seeding (10% FBS and 2% pen-strep in DMEM).

243 For seeding, one million cells of iPSC-CMs (derived from a healthy control line  
244 GM23338, Coriell Institute) and human adult cardiac fibroblasts (PromoCell 306-05A)  
245 were seeded per EHT at a 9:1 ratio. Both cell types were dissociated with TrypLE and  
246 resuspended in seeding media (10% FBS, 1% pen-strep, 1% NEAA, 1% L-glutamine,  
247 and 1% sodium pyruvate in DMEM). Tissues were maintained in DMEM supplemented  
248 with B27 with insulin and media were changed every other day.

249 A custom mechanical testing setup composed of a force transducer and linear  
250 actuators was used to characterize the EHT biomechanical properties. EHTs were  
251 maintained in Tyrode's solution at physiological conditions during testing (1 Hz pacing,  
252 35°C, and continuous perfusion). MATLAB scripts were used to record and process the  
253 mechanical data.

254

255

| <b>Tables</b>    |           |       |      |
|------------------|-----------|-------|------|
| <b>Table 1</b>   | Normality |       | Var  |
|                  | NF        | HF    |      |
| Age              | 0.72      | 0.25  | 0.22 |
| EF (%)           | 0.035     | 0.31  | 0.7  |
| <b>S Table 1</b> |           |       |      |
|                  | Normality |       | Var  |
|                  | CON       | KO    |      |
| Weight           | 0.11      | 0.18  | 0.15 |
| HR               | 0.92      | 0.06  | 0.85 |
| LVAW;d           | 0.22      | 0.96  | 0.08 |
| LVAW;s           | 0.67      | 0.90  | 0.12 |
| LVID;d           | 0.37      | 0.75  | 0.96 |
| LVID;s           | 0.30      | 0.08  | 0.82 |
| LVPW;d           | 0.001     | 0.026 | 0.60 |
| LVPW;s           | 0.054     | 0.049 | 0.52 |
| LV Mass AW       | 0.64      | 0.79  | 0.28 |
| LV vol;d         | 0.66      | 1.00  | 0.96 |
| LV Vol;s         | 0.57      | 0.41  | 0.58 |
| EF               | 0.24      | 0.34  | 0.74 |
| FS               | 0.17      | 0.15  | 0.59 |

| <b>T-Tests</b>   |           |                  |       |
|------------------|-----------|------------------|-------|
| Figure           | Normality |                  | Var   |
|                  | CON       | KO               |       |
| <b>1A</b>        | 0.33      | 0.09             | 0.036 |
| <b>1B</b>        | 0.27      | 0.52             | 0.91  |
| <b>1F</b>        | 0.89      | 0.78             | 0.84  |
| <b>1G</b>        | 0.75      | 0.28             | 0.24  |
| <b>2D</b>        | 0.33      | 0.19             | 0.27  |
| <b>2E</b>        | 0.79      | 0.38             | 0.43  |
| <b>5C</b>        | 0.90      | 0.33             | 0.82  |
| <b>S3A</b>       | 0.32      | 0.76             | 0.72  |
| <b>S3B</b>       | 0.51      | 0.86             | 0.79  |
| <b>S3C</b>       | 0.77      | 0.49             | 0.41  |
| <b>S3D</b>       | 0.88      | 0.99             | 0.84  |
| <b>s6A</b>       | 0.18      | 0.43             | 0.81  |
| <b>2B</b>        |           |                  |       |
| SL               | CON       | KO               |       |
| 1.8              | 0.39      | 0.79             | 0.53  |
| 2.0              | 0.013     | 0.79             | 0.51  |
| 2.2              | 0.37      | 0.089            | 0.51  |
| 2.4              | 0.68      | 0.62             | 0.90  |
| 2.6              | 0.23      | 0.45             | 0.77  |
| Scrambled        |           | abLIM1           |       |
| <b>5G</b>        | 0.13      | 0.45             | 0.37  |
| <b>5H</b>        | 7.00E-04  | 0.38             | 0.45  |
| <b>5I</b>        | 0.98      | 0.24             | 0.10  |
| NF               |           | HF               |       |
| <b>6A</b>        | 0.46      | 0.95             | 0.48  |
| <b>6B</b>        | 0.10      | 0.19             | 0.089 |
| <b>S8B</b>       | 7.10E-03  | 7.00E-04         | 0.05  |
| <b>S8C</b>       | 0.53      | 0.86             | 0.57  |
| <b>S8D</b>       | 0.51      | 0.25             | 0.46  |
| <b>S8E</b>       | 0.97      | 0.12             | 0.07  |
| <b>S7A</b>       | 0.053     | 0.91             | 0.19  |
| <b>S7B</b>       | 0.14      | 0.12             | 0.40  |
| Hi GSK-3 $\beta$ |           | Lo GSK-3 $\beta$ |       |
| <b>S9B</b>       | 0.79      | 0.56             | 0.28  |
| <b>S9C</b>       | 0.89      | 0.26             | 0.90  |

| One-Way ANOVAs |                    |      |      |      |       |
|----------------|--------------------|------|------|------|-------|
| Figure         | Normality          |      |      | Var  |       |
|                | CON                | KO   | AP   |      |       |
| <b>3D</b>      | 0.47               | 0.38 | 0.15 |      | 0.67  |
|                | CON WT Y216F Y216E |      |      |      |       |
| <b>4D</b>      | NA                 | 0.22 | 0.48 | 0.58 | 0.095 |
| <b>4F</b>      | 0.82               | 0.34 | 0.71 | 0.76 | 0.15  |
|                | CON KO Delta       |      |      |      |       |
| <b>s4E</b>     | 0.15               | 0.26 | 0.89 |      | 0.54  |
| <b>s4F</b>     | 0.96               | 0.99 | 0.41 |      | 0.26  |
| <b>s4G</b>     | 0.47               | 0.64 | 0.57 |      | 0.59  |

256

| Two-Way ANOVAs |                                   |         |        |        |
|----------------|-----------------------------------|---------|--------|--------|
| Figure         | CON 1.9                           | CON 2.3 | KO 1.9 | KO 2.3 |
| <b>2A</b>      | 0.44                              | 0.38    | 0.044  | 0.55   |
|                | NF Short NF Long HF Short HF Long |         |        |        |
| <b>6E</b>      | 0.088                             | 0.079   | 0.97   | 0.44   |
| <b>6F</b>      | 0.87                              | 0.018   | 0.79   | 0.50   |
|                | CON BL CON GSK KO BL KO GSK       |         |        |        |
| <b>S2</b>      | 0.16                              | 0.90    | 0.24   | 0.95   |
|                | Myo CON Myo KO Sol CON Sol KO     |         |        |        |
| <b>s6C</b>     | 0.44                              | 0.11    | 0.66   | 0.31   |

257

258 **Table S1:** P-values for normality and equal variance (var) tests for all statistical tests  
 259 presented in the study.

260

261

| Parameter       | CON            | KO             | p-value |
|-----------------|----------------|----------------|---------|
| Weight (g)      | 20.76 ± 2.10   | 19.40 ± 3.29   | 0.20    |
| HR (BMP)        | 376.67 ± 72.30 | 355.88 ± 31.24 | 0.48    |
| LVAW;d (mm)     | 0.73 ± 0.10    | 0.84 ± 0.18    | 0.087   |
| LVAW;s (mm)     | 1.0 ± 0.14     | 1.18 ± 0.23    | 0.036   |
| LVID;d (mm)     | 3.87 ± 0.50    | 3.87 ± 0.49    | 0.99    |
| LVID;s (mm)     | 2.84 ± 0.55    | 2.78 ± 0.52    | 0.77    |
| LVPW;d (mm)     | 0.90 ± 0.39    | 0.87 ± 0.33    | 0.99*   |
| LVPW;s (mm)     | 1.17 ± 0.42    | 1.19 ± 0.51    | 0.99*   |
| LV Mass AW (mg) | 113.84 ± 27.88 | 123.82 ± 38.93 | 0.48    |
| LV Vol;d (µl)   | 66.04 ± 18.8   | 66.02 ± 18.49  | 0.99    |
| LV Vol;s (µl)   | 32.54 ± 13.78  | 30.58 ± 11.63  | 0.71    |
| EF (%)          | 52.42 ± 11.30  | 54.52 ± 12.52  | 0.67    |
| FS (%)          | 26.84 ± 7.20   | 28.37 ± 8,50   | 0.64    |

262  
263  
264  
265

**Table S2:** LV metrics measured by echocardiography. *n*=12 mice/group. P-values calculated by unpaired t-test, \* indicates p-values calculated by Mann-Whitney tests

|                                                      | CON                |                    |                 | KO                |                    |                 |
|------------------------------------------------------|--------------------|--------------------|-----------------|-------------------|--------------------|-----------------|
|                                                      | 1.9 $\mu\text{m}$  | 2.3 $\mu\text{m}$  | <i>p</i> -value | 1.9 $\mu\text{m}$ | 2.3 $\mu\text{m}$  | <i>p</i> -value |
| <b>F<sub>max</sub></b><br><b>(mN/mm<sup>2</sup>)</b> | 17.36<br>±<br>1.90 | 22.05<br>±<br>1.97 | 0.00064         | 18.90 ± 1.67      | 21.38<br>±<br>1.57 | 0.069           |
| <b>EC<sub>50</sub> (μM)</b>                          | 1.66<br>±<br>0.14  | 1.18<br>±<br>0.13  | 0.000497        | 1.46 ± 0.14       | 1.43<br>±<br>0.12  | 0.96            |

266

267 **Table S3.** LDA Measurements - F<sub>max</sub> and EC<sub>50</sub> average and SEM at 1.9 μm and 2.3 μm  
 268 SL in CON and KO mice. P-values were calculated from two-way ANOVA with multiple  
 269 comparisons and represent pairwise comparisons within genotypes.

270

| Sarcomere Length ( $\mu\text{m}$ ) | CON              | KO               |
|------------------------------------|------------------|------------------|
| 1.8                                | 4.23 $\pm$ 0.77  | 3.53 $\pm$ 0.64  |
| 2.0                                | 7.20 $\pm$ 0.91  | 4.89 $\pm$ 0.75  |
| 2.2                                | 10.18 $\pm$ 1.22 | 7.33 $\pm$ 1.01  |
| 2.4                                | 15.43 $\pm$ 1.28 | 10.31 $\pm$ 1.24 |
| 2.6                                | 20.01 $\pm$ .62  | 13.87 $\pm$ 1.76 |

271

| Sarcomere Length ( $\mu\text{m}$ ) | CON BL            | CON GSK-3 $\beta$ |
|------------------------------------|-------------------|-------------------|
| 1.8                                | 0.666 $\pm$ 0.448 | 0.763 $\pm$ 0.452 |
| 2.0                                | 1.679 $\pm$ 0.012 | 1.721 $\pm$ 0.011 |
| 2.2                                | 8.763 $\pm$ 0.862 | 11.07 $\pm$ 1.205 |
| 2.4                                | 12.60 $\pm$ 0.982 | 15.53 $\pm$ 1.248 |
| 2.6                                | 18.12 $\pm$ 0.62  | 13.87 $\pm$ 1.76  |

| Sarcomere Length ( $\mu\text{m}$ ) | KO BL             | KO GSK-3 $\beta$  |
|------------------------------------|-------------------|-------------------|
| 1.8                                | 0.868 $\pm$ 0.688 | 1.378 $\pm$ 0.658 |
| 2.0                                | 3.538 $\pm$ 0.772 | 5.182 $\pm$ 0.645 |
| 2.2                                | 7.845 $\pm$ 1.101 | 9.668 $\pm$ 1.358 |
| 2.4                                | 11.76 $\pm$ 1.322 | 14.64 $\pm$ 1.743 |
| 2.6                                | 13.97 $\pm$ 1.427 | 18.00 $\pm$ 1.907 |

272

273 **Table S4.** Passive Tension Measurements (mN/mm<sup>2</sup>). Average Force and SEM for  
 274 each sarcomere length ( $\mu\text{m}$ ) in Con and KO mice, and Con and KO mice before (BL)  
 275 and after exogenous recombinant GSK-3 $\beta$  treatment.

276



277 **Table S5:** Mass spectrometry analysis of Con and GSK-3 $\beta$  KO myofilament-enriched  
278 samples.

279

280 Presented in attached Excel Spreadsheet

281

|                                                   | NF                |                   | HF                |                   |
|---------------------------------------------------|-------------------|-------------------|-------------------|-------------------|
|                                                   | 1.9 $\mu\text{m}$ | 2.3 $\mu\text{m}$ | 1.9 $\mu\text{m}$ | 2.3 $\mu\text{m}$ |
| <b>F<sub>max</sub> (mN/mm<sup>2</sup>)</b>        | 17.01 ± 1.63      | 24.52 ± 2.34      | 13.61 ± 1.43      | 20.90 ± 2.78      |
| <b>EC<sub>50</sub> (<math>\mu\text{M}</math>)</b> | 1.28 ± 0.05       | 0.94 ± 0.80       | 0.85 ± 0.06       | 0.81 ± 0.07       |

286 **Table S6.** LDA Measurements- F<sub>max</sub> and EC<sub>50</sub> averages and error at 1.9  $\mu\text{m}$  and 2.3  $\mu\text{m}$   
 287 SL in NF and HF samples.

288

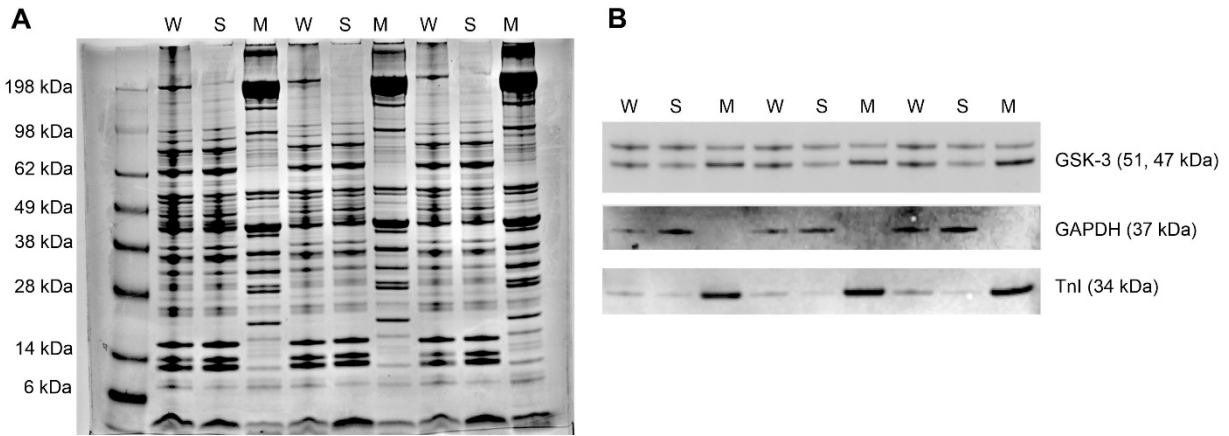

290  
 291  
 292  
 293  
 294  
 295  
 296

**Figure S1. Myofilament preparation of left ventricle myocardium enriches for myofilament proteins while excluding cytosolic contents. (A)** Coomassie stained SDS-Page gel depicting left ventricle prepared as whole tissue lysis (W), soluble fraction (S), myofilament enrichment (M) **(B)** Western blot of W, S, and M samples blotted for GSK-3, GAPDH, and Troponin I (TnI).

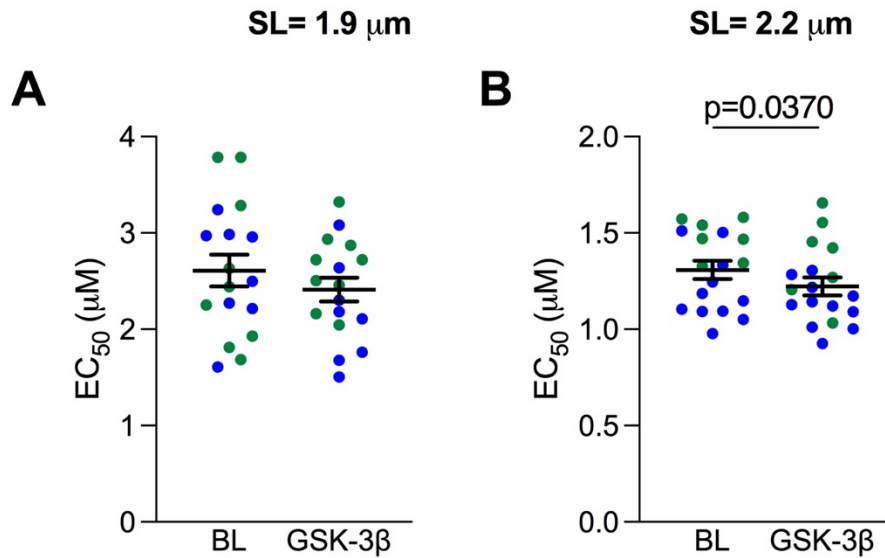

298 **Figure S2.** Summary data of EC<sub>50</sub> of CON (Blue) and KO (Green) mice at baseline (BL)  
 299 and after GSK-3β treatment (GSK-3β) depicted as mean ± SEM at a **(A)** short SL of 1.9  
 300 μm in Con ( $n= 8$  myocytes from 3 mice) and KO ( $n= 8$  myocytes from 3 mice). P-values  
 301 were calculated by paired t-test. Mean ± SEM is as follows: BL:  $2.609 \pm 0.1651$ , GSK-  
 302  $3\beta$ :  $2.412 \pm 0.1236$ . **(B)** The same experiments were performed on a separate cohort of  
 303 animals at a long SL of 2.2 μm in CON ( $n = 11$  myocytes from 4 mice) and KO ( $n = 7$   
 304 myocytes from 3 mice). P-values were calculated by paired t-test. Mean ± SEM is as  
 305 follows: BL:  $1.308 \pm 0.047$ , GSK-3β:  $1.222 \pm 0.047$ .

306

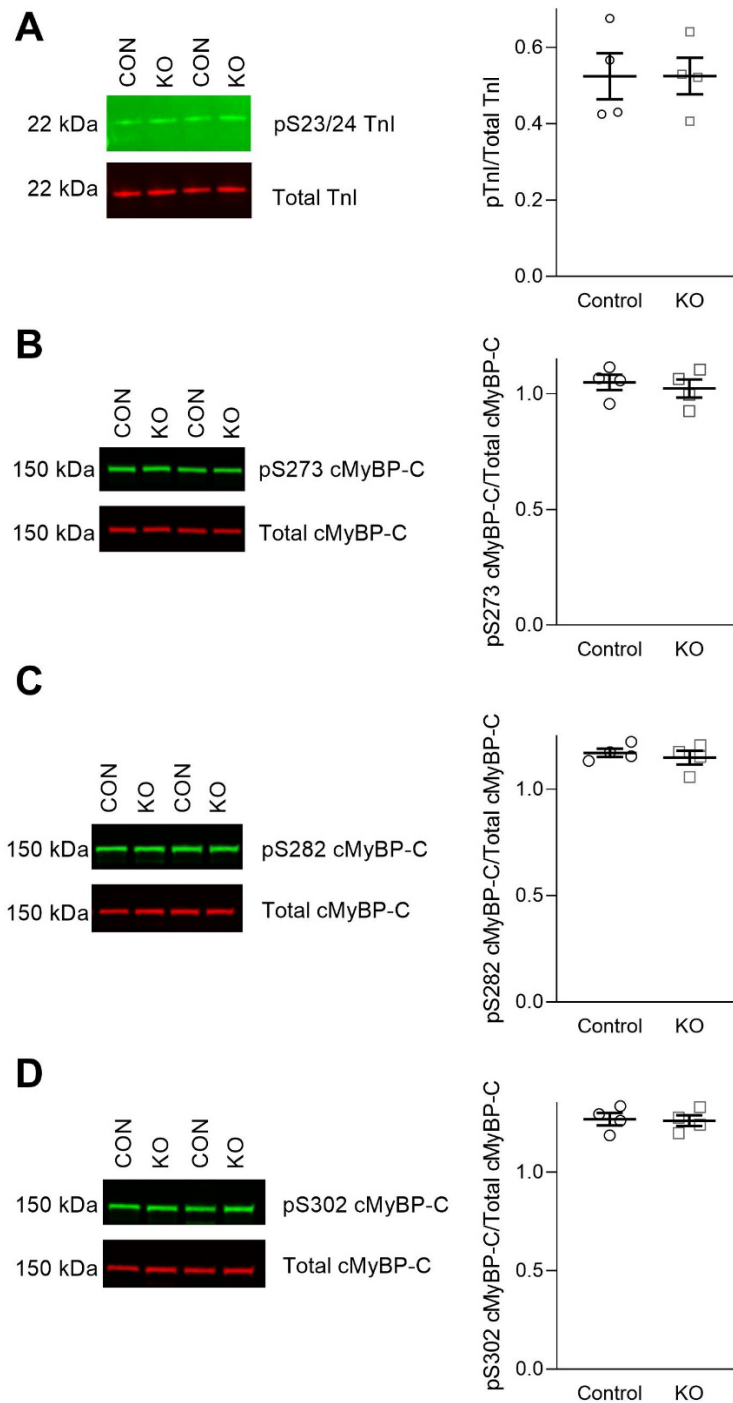

308 **Figure S3. Troponin I and cMyBP-C phosphorylation is unchanged in GSK-3 $\beta$  KO**  
 309 **mice (A)** Western blot depicting total Troponin I (Tnl) and pS23/24 Tnl in CON and  
 310 GSK-3 $\beta$  KO mice. Phosphorylation sites on cMyBP-C in control and GSK-3 $\beta$  KO mice  
 311 **(B)** pS273, **(C)** pS282, and **(D)** pS302 normalized to total cMyBP-C ( $n=4$ /group). Groups  
 312 were compared with Mann-Whitney tests.  
 313

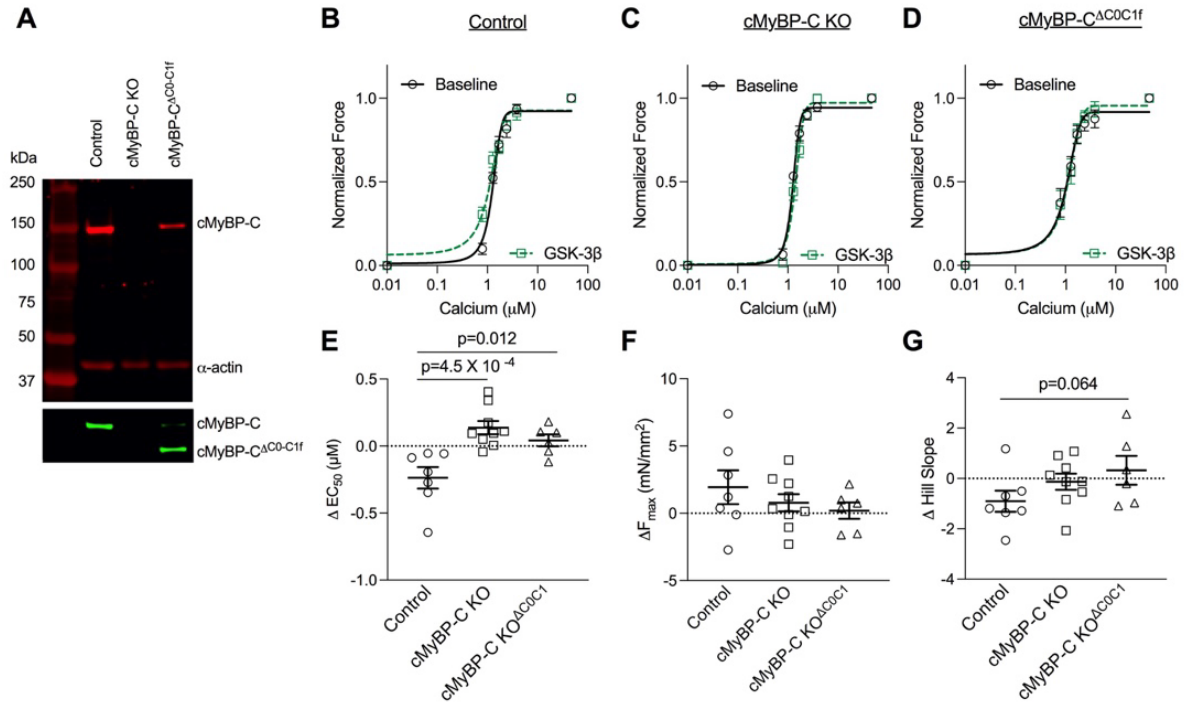

315 **Figure S4. GSK-3 $\beta$  is unable to modulate calcium sensitivity in cMyBP-C KO or**  
 316 **cMyBP-C $\Delta$ C0-C1f mice.** (A) Representative western blot analyses demonstrating the  
 317 level of cMyBP-C in cMyBP-C KO and cMyBP-C $\Delta$ C0-C1f mouse hearts, compared to  
 318 control mouse hearts. The upper panel was performed with both amino terminal-specific  
 319 cMyBP-C<sup>31</sup> and actin antibodies. The bottom panel was treated with carboxy terminal-  
 320 specific cMyBP-C antibodies<sup>31</sup>. (B) Mean force as a function of calcium concentration  
 321 and fitted curves for skinned myocytes at baseline and with exogenous GSK-3 $\beta$   
 322 treatment from LV from Control ( $n=3$  mice, 2-3 cells/mouse) (C) MyBP-C KO ( $n=3$   
 323 mice, 3 cells/ mouse) and (D) MyBP-C $\Delta$ C0-C1f ( $n=3$  mice, 2 cells/mouse) mice. The SL  
 324 was set to 2.1  $\mu$ m for all experiments. Summary data of (E)  $\Delta$ EC<sub>50</sub> Mean  $\pm$  SEM:  
 325 Control: -0.237  $\pm$  0.080, cMyBP-C KO: 0.137  $\pm$  0.064, MyBP-C $\Delta$ C0-C1f: 0.042  $\pm$  0.045 (F)  
 326  $\Delta$ F<sub>max</sub> Mean  $\pm$  SEM: Control: 1.939  $\pm$  1.26, cMyBP-C KO: 0.78  $\pm$  0.77, MyBP-C $\Delta$ C0-C1f:  
 327 0.198  $\pm$  0.609 and (G)  $\Delta$ Hill slope Mean  $\pm$  SEM: Control: -0.901  $\pm$  0.419, cMyBP-C KO:  
 328 -0.128  $\pm$  0.405, MyBP-C $\Delta$ C0-C1f: 0.321  $\pm$  0.057. Statistics were calculated by one-way  
 329 ANOVA.

330  
 331

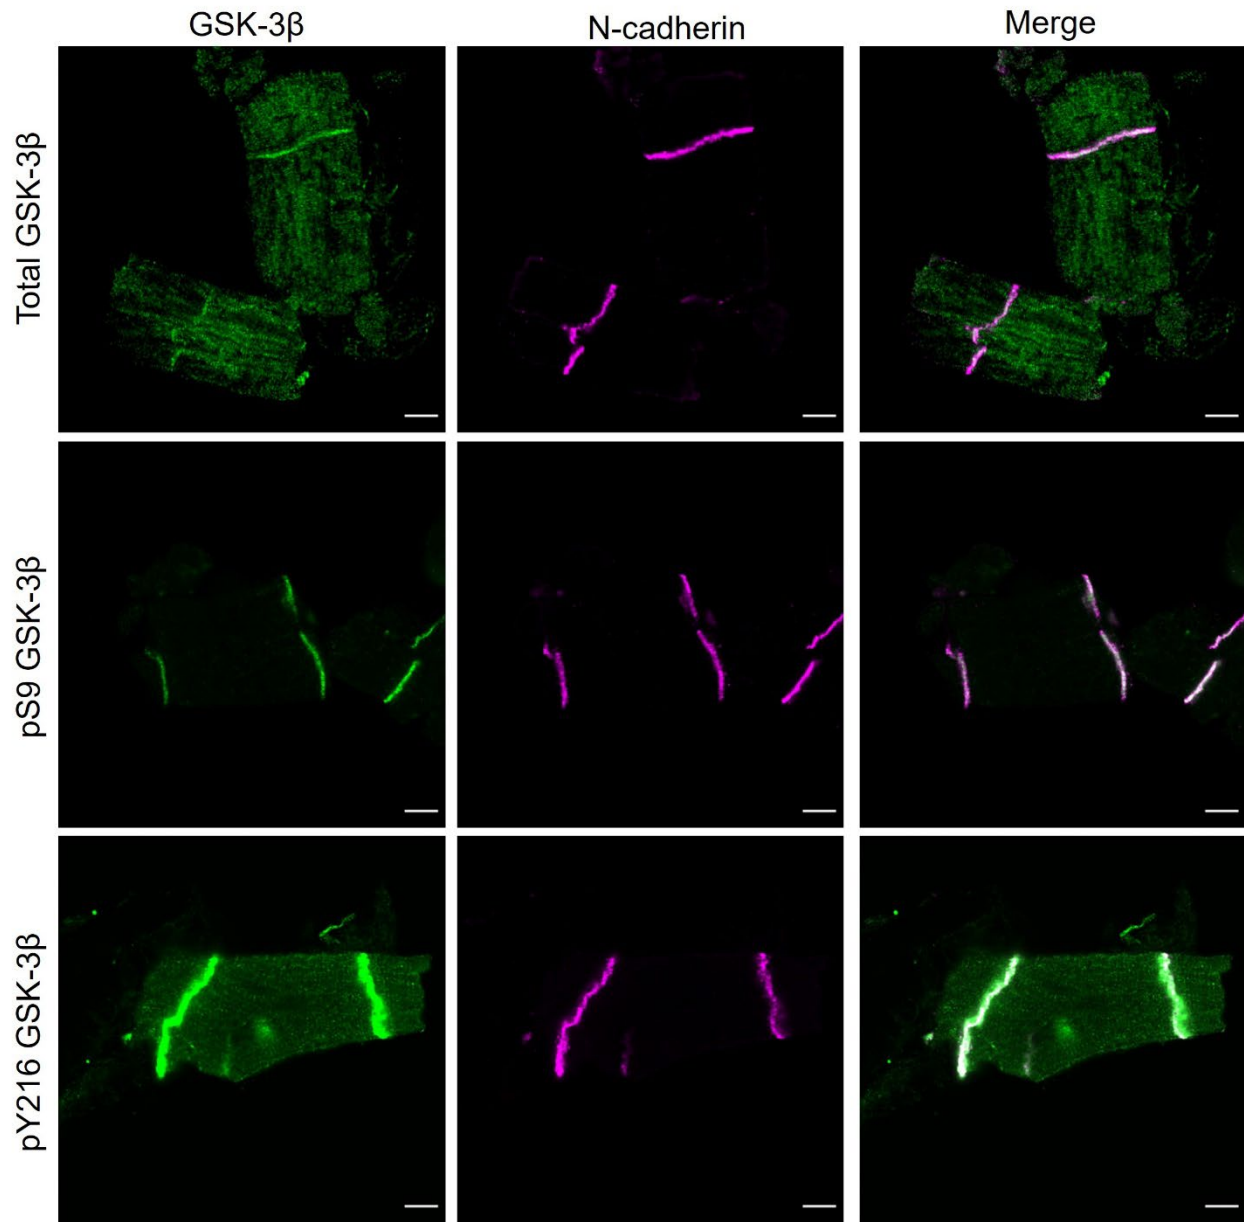

333 **Figure S5. GSK-3 $\beta$  localizes to the intercalated disc.** Human NF myocytes depicting  
 334 either Total, pS9, or pY216 GSK-3 $\beta$  (green) counterstained against n-cadherin (pink).  
 335 Scale bar = 10  $\mu$ m.

336

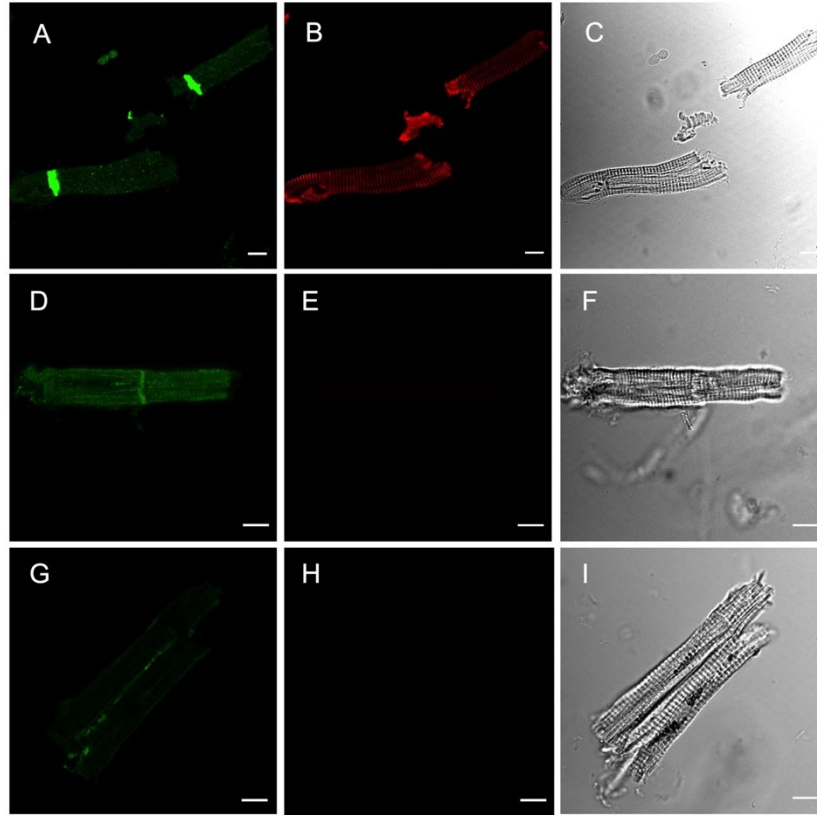

338 **Figure S6. Antibody controls in human LV.** Human LV stained with primary  
339 antibodies (A) total GSK-3 $\beta$  and (B) and actinin, with (C) corresponding brightfield  
340 image. IgG controls of (D) rabbit IgG and (E) mouse IgG and (F) corresponding  
341 brightfield image. Secondary controls of (G) alexa-fluor 488 anti-rabbit and (H) alexa-  
342 fluor 568 anti-mouse with (I) corresponding brightfield image. Scale bars = 10 microns.

343

344



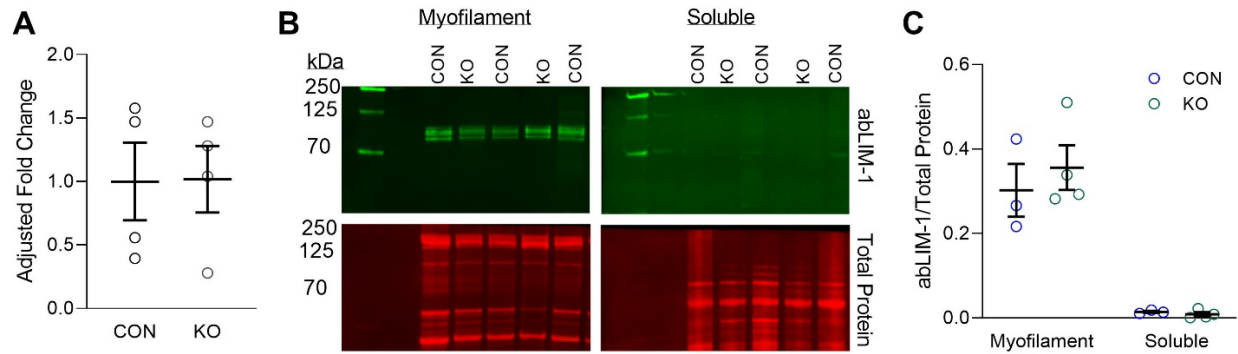

346 **Figure S7. abLIM-1 characterization in GSK-3 $\beta$  KO mice** (A) RNA transcript levels of  
 347 abLIM-1 in GSK-3 $\beta$  CON and KO mice ( $n=4$ ). Statistics were calculated by Mann-  
 348 Whitney test. (B) abLIM-1 and total protein in myofilament and soluble fractions (C)  
 349 myofilament and soluble abLIM-1 normalized to total protein in GSK-3 $\beta$  CON ( $n=3$ ) and  
 350 KO ( $n=4$ ) mice. Statistics were calculated by two-way ANOVA.  
 351

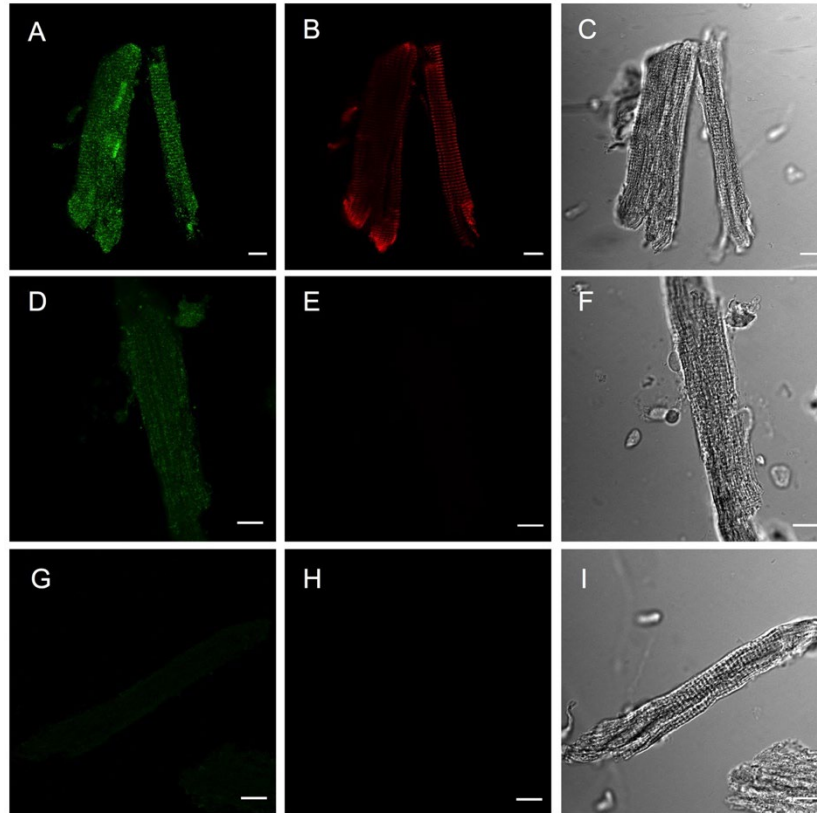

353 **Figure S8. Antibody controls in mouse LV.** Mouse LV stained with primary antibodies  
354 (A) total GSK-3 $\beta$  and (B) and actinin, with (C) corresponding brightfield image. IgG  
355 controls of (D) rabbit IgG and (E) mouse IgG and (F) corresponding brightfield image.  
356 Secondary controls of (G) alexa-fluor 488 anti-rabbit and (H) alexa-fluor 568 anti-mouse  
357 with (I) corresponding brightfield image. Scale bars = 10 microns.

358

359

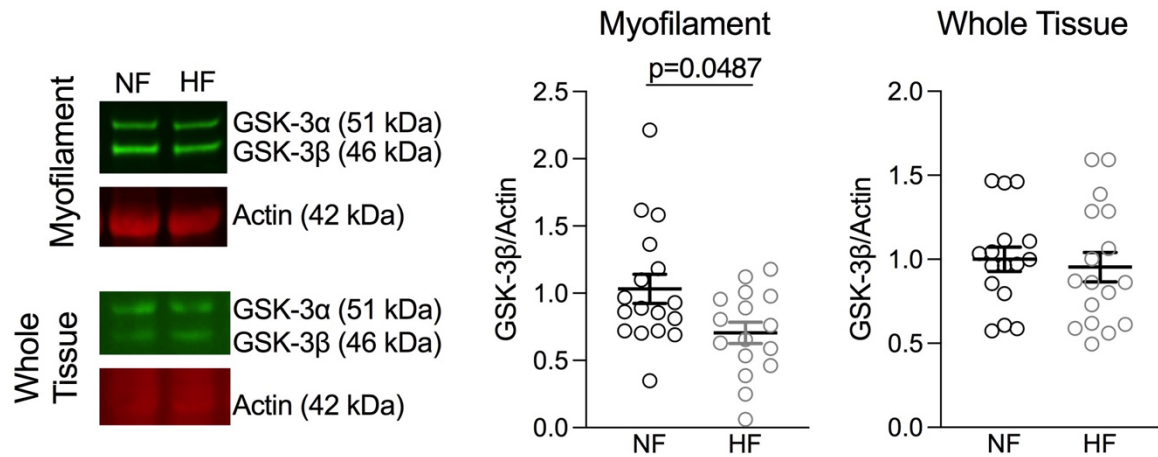

361  
 362  
 363  
 364  
 365  
 366

**Figure S9. Myofilament GSK-3β is reduced when normalized to actin.** Myofilament (p=0.049 by Mann Whitney test) and Whole tissue preparations of NF and HF LV, normalized to the myofilament protein Actin. *n* values are as follows: NF myofilament = 17, KO myofilament = 16, NF whole tissue = 16, HF whole tissue = 17.

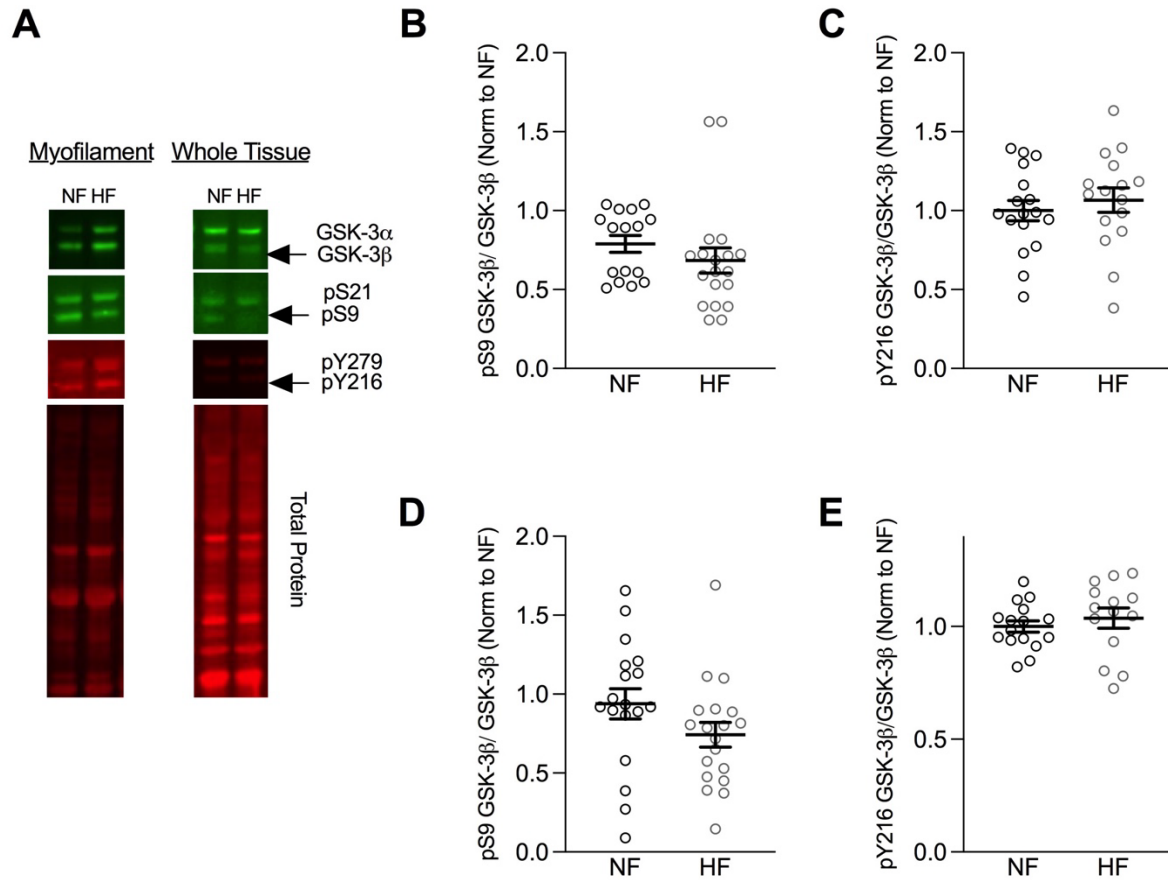

368 **Figure S10. pS9 and pY216 are unchanged in heart failure.** (A) Representative  
 369 western blot from myofilament enriched and whole tissue preparations from NF and HF  
 370 patients. (B) pS9 GSK-3 $\beta$  normalized to total GSK-3 $\beta$  in myofilament enriched tissue  
 371 from NF ( $n=16$ ) and HF ( $n=19$ ) patients. P-value was calculated from a non-parametric  
 372 t-test (C) pY216 GSK-3 $\beta$  normalized to total GSK-3 $\beta$  in myofilament enriched tissue in  
 373 NF ( $n=17$ ) and HF ( $n=16$ ) patients. (D) pS9 GSK-3 $\beta$  normalized to total GSK-3 $\beta$  in  
 374 whole tissue prep from NF ( $n=18$ ) and HF ( $n=19$ ) patients. (E) pY216 GSK-3 $\beta$   
 375 normalized to total GSK-3 $\beta$  in whole tissue lysis in NF ( $n=16$ ) and HF ( $n=14$ ) patients.  
 376  
 377

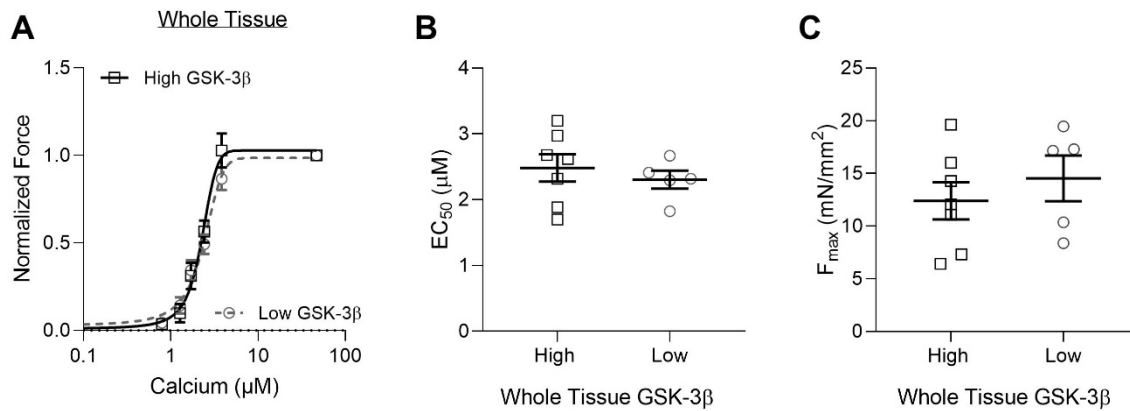

379 **Figure S11. Whole tissue GSK-3 $\beta$  does not correlate with calcium sensitivity in**  
 380 **human myocytes. (A)** Force-calcium curves of human LV myocytes sorted by whole  
 381 tissue GSK-3 $\beta$ , low ( $n= 3$  samples, 7 cells) and low ( $n= 3$  samples, 5 cells). **(B)** EC<sub>50</sub>  
 382 and **(C)** F<sub>max</sub> for whole tissue sorted samples. Statistics were calculated by Mann-  
 383 Whitney test.  
 384
